# Supplementary material for: Sn-encapsulated N-doped porous carbon fibers for enhancing lithium-ion battery performance
Source: Royal Society of Chemistry journal article supplement (doi:10.1039/c8ra10201e), 2019-01-01
Supplement: c8ra10201e1.pdf [file c8ra10201e1.pdf]

## Supplementary material

### **Sn-encapsulated N-doped porous carbon fibers for enhancing lithium-ion battery performance**

**Zhilong Xu, Lei Fan\*, Xiangyin Ni, Jie Han\*, Rong Guo**

School of Chemistry and Chemical Engineering, Yangzhou University, Yangzhou 225009, China

\*E-mail address: fanlei@yzu.edu.cn (Lei Fan)

hanjie@yzu.edu.cn (Han Jie)

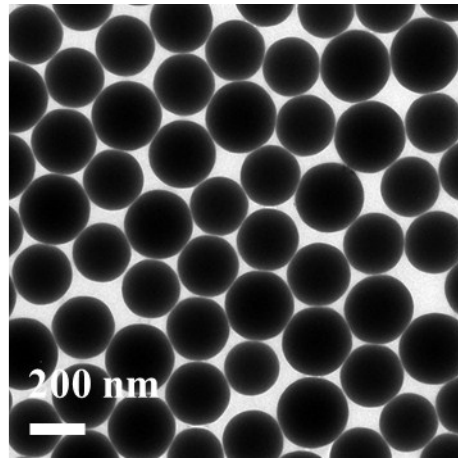

Figure S1. The TEM images of SiO<sub>2</sub>.

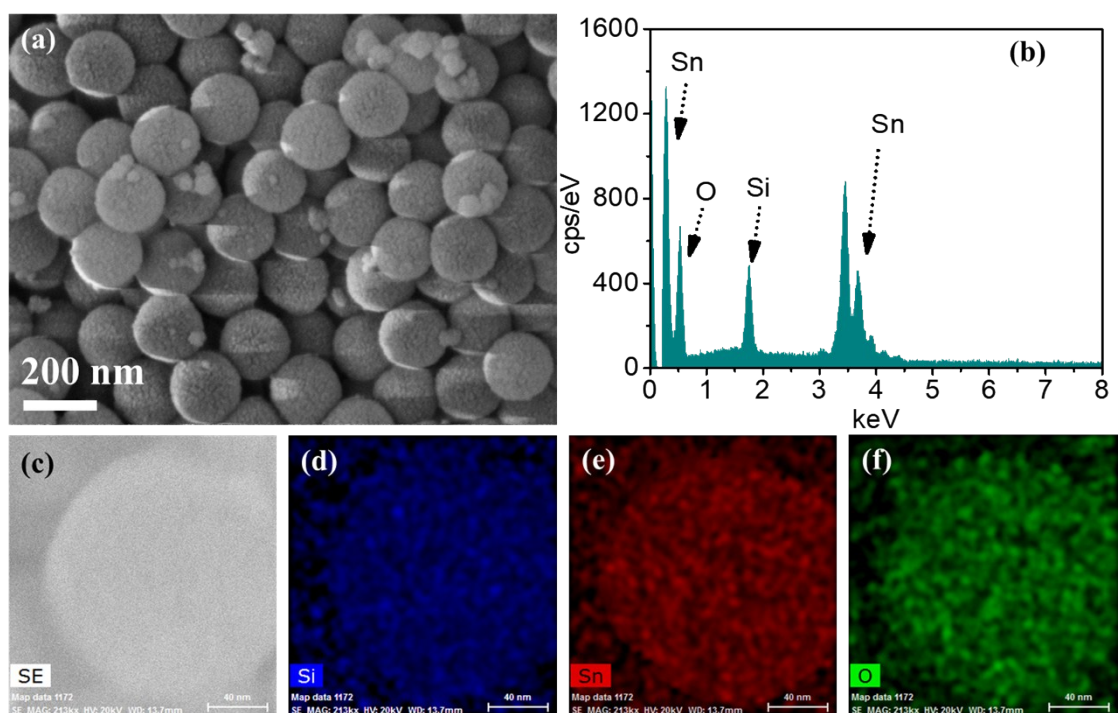

Figure S2. (a) The SEM images of  $\text{SiO}_2/\text{SnO}_2$ , (b) The EDS analysis of Sn/NPCFs-0.5, (c-f) EDS mappings of (d) Si, (e) Sn and (f) O from panel c.

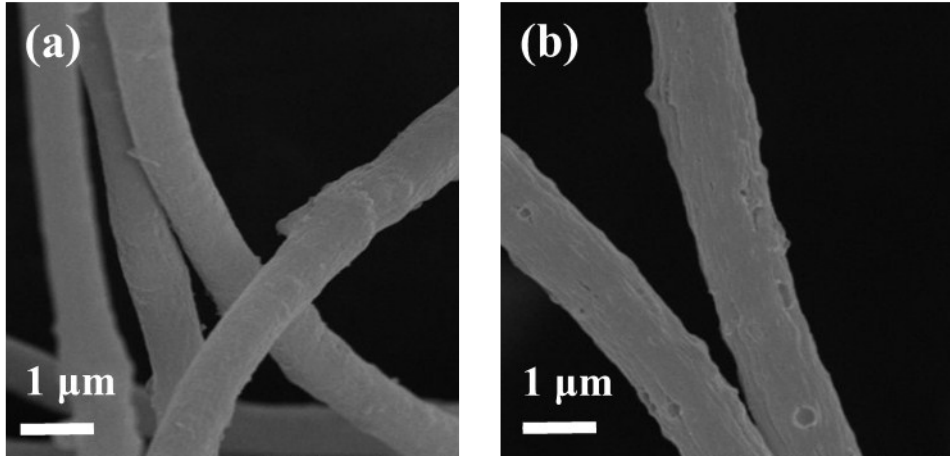

Figure S3. (a-b) The SEM images of Sn/NPCFs-0.2 and Sn/NPCFs-1.

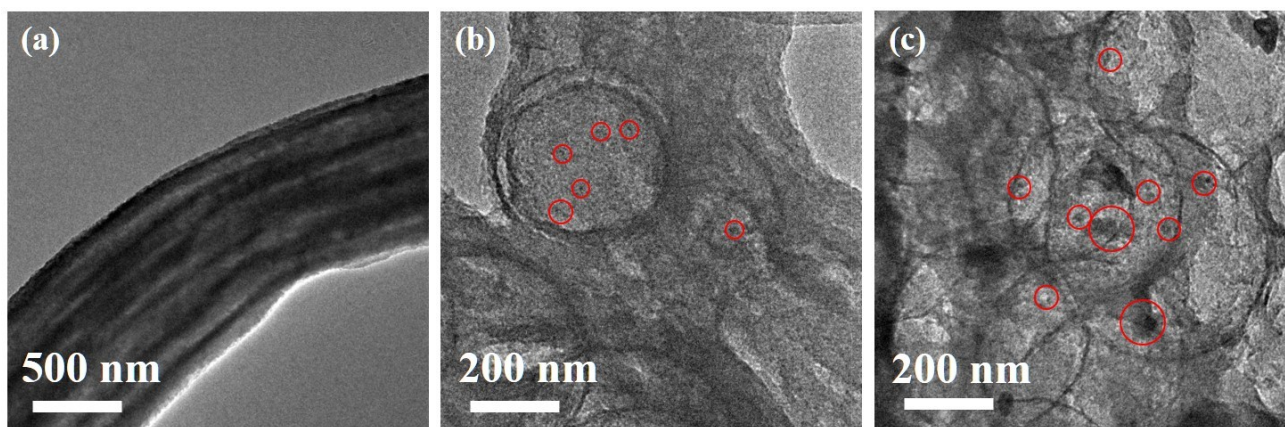

Figure S4. The TEM images of (a) NPCFs; (b) Sn/NPCFs-0.2; (c) Sn/NPCFs-1.

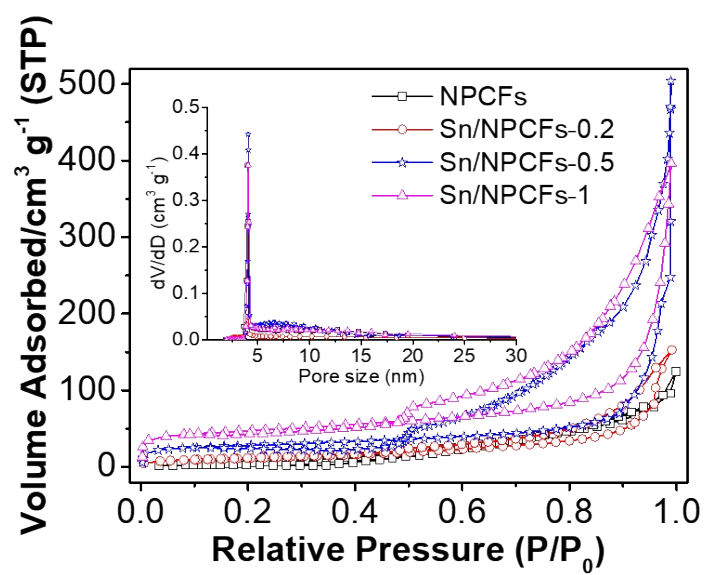

Figure S5. Nitrogen adsorption-desorption isotherms (Inset is the corresponding pore size distribution.).

Table S1. N<sub>2</sub> sorption isotherms and the corresponding pore size distribution of NPCFs and Sn/NPCFs.

| Sample       | The best size of pores(nm) | BET surface area (m <sup>2</sup> g <sup>-1</sup> ) | volume of pores (cm <sup>3</sup> g <sup>-1</sup> ) |
|--------------|----------------------------|----------------------------------------------------|----------------------------------------------------|
| NPCFs        | 3.30                       | 40.99                                              | 0.2390                                             |
| Sn/NPCFs-0.2 | 3.97                       | 43.95                                              | 0.2618                                             |
| Sn/NPCFs-0.5 | 4.05                       | 93.55                                              | 0.9008                                             |
| Sn/NPCFs-1   | 4.03                       | 155.4                                              | 0.6716                                             |

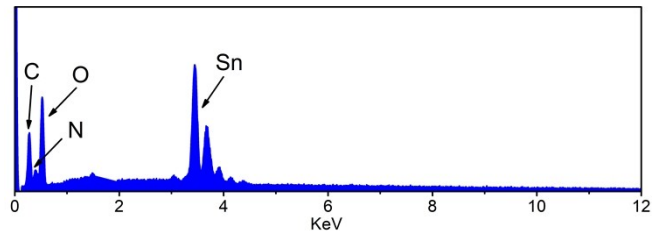

Figure S6. The EDS analysis of Sn/NPCFs-0.5.



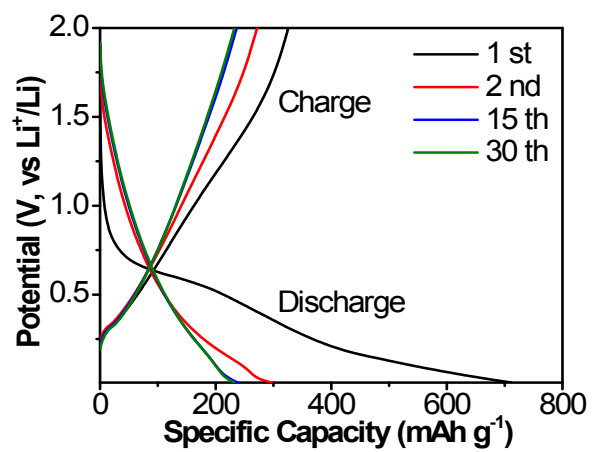

Figure S7. Charge and discharge curves of NPCFs with a current density of 500 mA g<sup>-1</sup>.

Table S2. Cycling performance and capacity of Sn/carbon nanomaterials reported in previous works

| Materials                                              | Synthesis method                           | Electrochemical performance |              |                           | Ref.         |
|--------------------------------------------------------|--------------------------------------------|-----------------------------|--------------|---------------------------|--------------|
|                                                        |                                            | Current density             | Cycle number | Capacity retention        |              |
| Sn                                                     | One-step reduction method                  | 200 mA g <sup>-1</sup>      | 50           | < 50 mAh g <sup>-1</sup>  | [1]          |
| Sn/C                                                   | Annealing                                  | 100 mA g <sup>-1</sup>      | 100          | 200 mAh g <sup>-1</sup>   | [2]          |
| Sn/Graphene<br>90 wt.% Sn                              | Microwave reaction                         | 100 mA g <sup>-1</sup>      | 20           | 400 mAh g <sup>-1</sup>   | [3]          |
| Sn-C<br>Composite                                      | Calcination                                | 100 mA g <sup>-1</sup>      | 100          | 450 mAh g <sup>-1</sup>   | [4]          |
| CF/Sn SnO <sub>2</sub> @C                              | Carbothermic reduction                     | 100 mA g <sup>-1</sup>      | 50           | 657.6 mAh g <sup>-1</sup> | [5]          |
| 0.2 Sn-1200                                            | Electrospinning and pyrolysis              | 70 mA g <sup>-1</sup>       | 100          | 400 mAh g <sup>-1</sup>   | [6]          |
| Sn@C/C (I)<br>nanofibers<br>using flow ratio<br>of 1:3 | Electrospinning                            | 50 mA g <sup>-1</sup>       | 50           | 456 mAh g <sup>-1</sup>   | [7]          |
| Sn-SnO <sub>2</sub> /C<br>composite<br>nanofibers      | Electrospinning<br>composite<br>nanofibers | 400 mA g <sup>-1</sup>      | 10           | 390 mAh g <sup>-1</sup>   | [8]          |
| SCNF                                                   | Electrospinning                            | 100 mA g <sup>-1</sup>      | 10           | 550 mAh g <sup>-1</sup>   | [9]          |
| Sn-<br>encapsulated<br>carbon fibers                   | Electrospinning<br>and carbonization       | 100 mA g <sup>-1</sup>      | 6            | 750 mAh g <sup>-1</sup>   | This<br>work |
| Sn-<br>encapsulated<br>carbon fibers                   | Electrospinning<br>and carbonization       | 500 mA g <sup>-1</sup>      | 100          | 400 mAh g <sup>-1</sup>   | This<br>work |

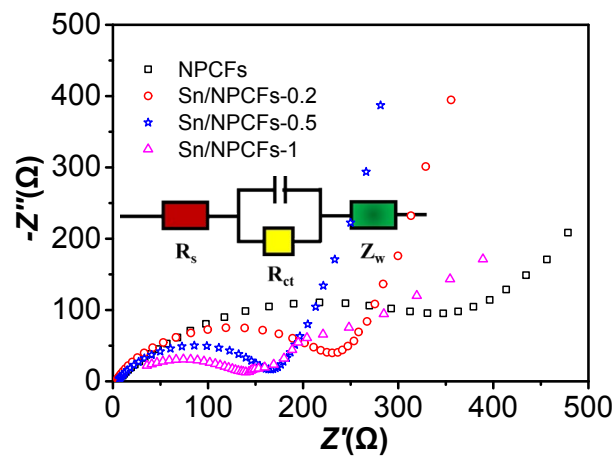

Figure S8. Electrochemical impedance spectra of the NPCFs, Sn/NPCFs-0.2, Sn/NPCFs-0.5, Sn/NPCFs-1.

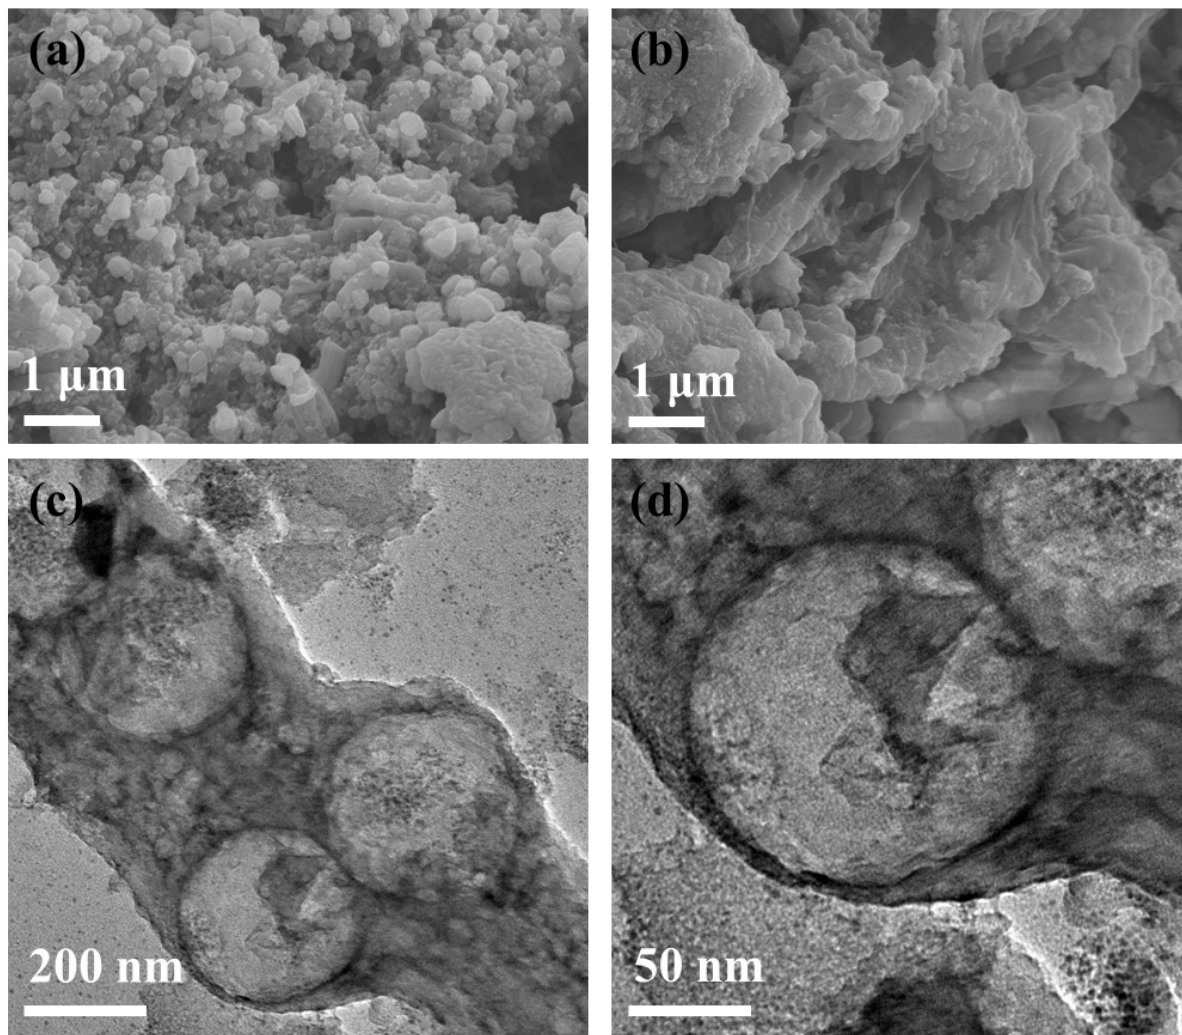

Figure S9. (a) SEM image of the as-prepared Sn/NPCFs-0.5 electrode. (b) SEM, (c-d) TEM images of the Sn/NPCFs-0.5 after 5 cycles.

## References

- [1]. Y. Li, J. Shi and Y. Liang, *Int. J. Electrochem. Sci.*, 2018, **13**, 2366.
- [2]. J. Lee, T. Hwang, J. Oh, J. M. Kim, Y. Jeon and Y. Piao, *J. Alloys Compd.*, 2018, **736**, 42.
- [3]. F. R. Beck, R. Epur, D. Hong, A. Manivannan and P. N. Kumta, *Electrochim. Acta*, 2014, **127**, 299.
- [4]. J. Hassoun, G. Derrien, S. Panero and B. Scrosati, *Adv. Mater.*, 2008, **20**, 3169.
- [5]. J. Ding, W. Zhu, C. Liu, C. Ma, Y. Yang, H. Ji and G. Yang, *J. Alloys Compd.*, 2018, **750**, 220.
- [6]. A. Tolosa, M. Widmaier, B. Krüner, J. M. Griffin and V. Presser, *Sustain. Energ. Fuels*, 2018, **2**, 215.
- [7]. X. Xia, X. Wang, H. Zhou, X. Niu, L. Xue, X. Zhang and Q. Wei, *Electrochim. Acta*, 2014, **121**, 345.
- [8]. D. Narsimulu, S. Vadnala, E. Srinadhu and N. Satyanarayana, *J. Mater. Sci.-Mater. El.*, 2018, **29**, 11117.
- [9]. Y. Chen, D. Ge, J. Zhang, R. Chu, J. Zheng, C. Wu, Y. Zeng, Y. Zhang and H. Guo, *Nanoscale*, 2018, **10**, 17378.
